# Supplementary material for: Isomer effect study of pyridinium-type cationic fluorophores: multiple functions and internal optical mechanisms
Source: Royal Society of Chemistry journal article supplement (doi:10.1039/d4qm00578c), 2024-01-01
Supplement: d4qm00578c1.pdf [file d4qm00578c1.pdf]

## Supplementary Information

### **Isomer Effect Study of Pyridinium-type Cationic Fluorophores: Multiple Functions and Internal Optical Mechanism**

*Yasong Cao<sup>a</sup>, Caili Zhang<sup>b</sup>, Zhonghua Zhao<sup>a</sup>, Haowen Huang<sup>a</sup>, Jiatong Xu<sup>a</sup>, Richao Shen<sup>a</sup>, Cheng Zeng<sup>a</sup>, Jiawei Lv<sup>a</sup>, Ziqiang Lei<sup>a</sup> and Hengchang Ma<sup>\*a</sup>*

Key Laboratory of Polymer Materials of Gansu Province, Key Laboratory of Eco-Environment-Related Polymer Materials Ministry of Education, College of Chemistry and Chemical Engineering, Northwest Normal University, Lanzhou 730070, PR China

\*E-mail: [mahczju@hotmail.com](mailto:mahczju@hotmail.com)

### **Table of Contents**

#### **1. EXPERIMENTAL SECTION**

#### **2. RESULTS**

#### **3. NMR data spectra**

#### **4. HRMS data spectra**

#### **5. REFERENCES**

## 1. EXPERIMENTAL SECTION

### 1.1 Materials and Chemicals.

The chemicals used in the experiments included carbon tetrachloride (CCl<sub>4</sub>, 99%), ultra-pure water (water purifier, Resistivity of 18 mΩ\*cm), Ethyl Alcohol (C<sub>2</sub>H<sub>5</sub>OH, 99.9%), tetrahydrofuran (THF, 99%), petroleum ether (PE, 98%), ethyl acetate (EA, 98%), dichloromethane (DCM, 99.5%), hexane (98%), methanol (C<sub>2</sub>H<sub>5</sub>OH, 99.9%), The materials used in the experiments included BPO (75%), Pd(pph<sub>3</sub>)<sub>4</sub> (99%), Pd(OAc)<sub>2</sub> (99%), K<sub>2</sub>CO<sub>3</sub> (99.9%), Mg<sub>2</sub>SO<sub>4</sub> (99%), 4-methylbenzophenone (98%), *N*-bromosuccinimide (NBS, 99%), (4-(diphenylamino)phenyl)boronic acid (98%), 2-bromopyridine (99%), 3-bromopyridine (98%), 4-bromotriphenylamine (98%), pyridine-4-boronic acid (98%). The progress of all reactions was monitored by TLC using glass plates precoated with silica gel 60 F254 to a thickness of 0.5 mm. Silica gel (Guiyang Chanyuan Zhi-Cheng Biotechnology Co.) was used for column chromatography. All chemical materials used in this study were obtained from commercial suppliers without further purified.

### 1.2 Measurements and Methods.

<sup>1</sup>H NMR (600 MHz), <sup>13</sup>C NMR (150 MHz) spectra were recorded on MERCURY spectrometer at 25 °C in CDCl<sub>3</sub> or DMSO-*d*<sub>6</sub>. All chemical shifts (δ) were reported in ppm and coupling constants (J) in Hz. High resolution mass spectra (HRMS) were recorded using Thermoscientific Q

Exactive instruments under electrospray ionization (ESI) conditions. UV-visible absorption spectra (UV) were recorded on a TU-1901 and UV-3600i plus spectrometer. Fluorescence spectra were measured using a FluoroSENS 9003 fluorescence spectrophotometer at room temperature. Solid-state quantum yield was measured using a Hamamatsu C11347 Quantaurs-QY integrating sphere. Fluorescence lifetime was obtained on FluoTime 300. Optimization of molecular structures and electronic excitation calculations from  $S_0$  to  $S_1$  at the B3LYP/6-31G(d) computational level used the DFT and TDDFT methods to calculate in Gaussian 09 software drawing with VMD and Multiwfn. X-ray diffraction (XRD) was carried out with a Rigaku (Japan) D/max-2400 X-ray powder diffractometer, using Ni-filtered Cu  $K\alpha$  radiation at 40 kV and 40 mA. X-ray crystallography was achieved using a SuperNova X-ray single crystal diffractometer with graphite monochromated Mo- $K\alpha$  radiation ( $\lambda = 0.71073 \text{ \AA}$ ) or Cu- $K\alpha$  radiation ( $\lambda = 1.54184 \text{ \AA}$ ).

### 1.3 The syntheses route of molecules

#### 1.3.1 (4-(bromomethyl)phenyl)(phenyl)methanone (BP-Me-Br)<sup>[1]</sup>

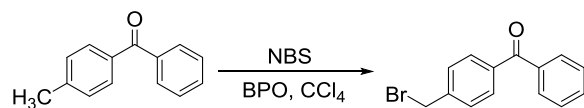

4-Methylbenzophenone (1.96 g, 196.24 g·mol<sup>-1</sup>, 10.00 mmol) and NBS (2.14 g, 177.98 g·mol<sup>-1</sup>, 12.00 mmol) were placed in a 100 mL flask. Then, 30 mL of CCl<sub>4</sub> was added to dissolve the components. The reaction was heated to 50 °C under N<sub>2</sub> atmosphere; meanwhile, BPO (10.00 mg) was slowly added to the reaction solution using a balloon. Next, the reaction was refluxed under light conditions for 8 hours. Finally, the reaction mixture was concentrated by rotary evaporation and the crude product was purified by silica gel column using petroleum ether as eluent to give BP-Me-Br as white solid (yield: 93%). <sup>1</sup>H NMR (400 MHz, Chloroform-d) δ 7.79 (dd, J = 7.5, 4.7 Hz, 4H), 7.60 (t, J = 7.4 Hz, 1H), 7.49 (dt, J = 10.0, 5.2 Hz, 4H), 4.53 (s, 2H). <sup>13</sup>C NMR (150 MHz, Chloroform-d) δ 195.96, 142.09, 137.45, 137.37, 132.56, 130.53, 130.33, 130.03, 130.00, 128.94, 128.42, 128.34, 126.55, 32.26.

#### 1.3.2 *N,N*-diphenyl-4-(pyridin-2-yl)aniline (*o*-TPA-Py)<sup>[2]</sup>

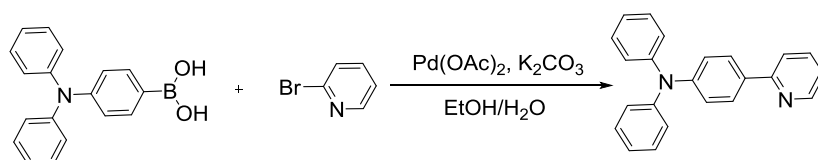

(4-(diphenylamino)phenyl)boronic acid (2.60 g, 289.14 g·mol<sup>-1</sup>, 9.00 mmol), 2-bromopyridine (1.00 g, 158.00 g·mol<sup>-1</sup>, 6.33 mmol), Pd(OAc)<sub>2</sub> (20.00 mg, 224.49 g·mol<sup>-1</sup>, 0.09 mmol) and K<sub>2</sub>CO<sub>3</sub> (1.65 g, 138.20 g·mol<sup>-1</sup>

<sup>1</sup>, 11.94 mmol) were transferred to a 100 mL round flask. Then a mixed solvent of CH<sub>3</sub>CH<sub>2</sub>OH (24 mL) and H<sub>2</sub>O (8 mL) was added and the reaction was refluxed at 80 °C for 16 hours. The organic solvent was concentrated by rotary evaporation. Next, the reaction mixture was extracted three times with DCM and H<sub>2</sub>O, removing residual water with Mg<sub>2</sub>SO<sub>4</sub>. Eventually, the crude product was purified by silica gel column using a mixture (ethyl acetate/petroleum ether, 1:40) as eluent to give *o*-TPA-Py in white solid form (yield: 81%). <sup>1</sup>H NMR (400 MHz, Chloroform-d) δ 8.66 (d, J = 4.7 Hz, 1H), 7.87 (d, J = 8.7 Hz, 2H), 7.72 – 7.65 (m, 2H), 7.28 (t, J = 7.8 Hz, 4H), 7.15 (dd, J = 8.1, 4.4 Hz, 7H), 7.05 (t, J = 7.3 Hz, 2H). <sup>13</sup>C NMR (150 MHz, Chloroform-d) δ 157.05, 149.54, 148.71, 147.47, 136.66, 133.06, 129.31, 127.73, 124.73, 123.22, 123.20, 121.45, 119.86.

### 1.3.3 *N,N*-diphenyl-4-(pyridin-3-yl)aniline (*m*-TPA-Py)<sup>[2]</sup>

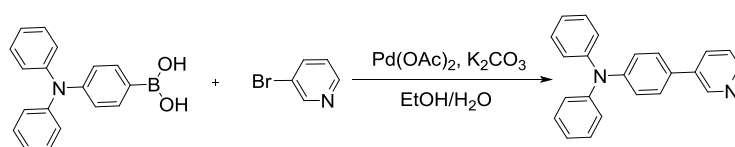

(4-(diphenylamino)phenyl)boronic acid (2.60 g, 289.14 g·mol<sup>-1</sup>, 9.00 mmol), 3-bromopyridine (1.00 g, 158.00 g·mol<sup>-1</sup>, 6.33 mmol), Pd(OAc)<sub>2</sub> (20.00 mg, 224.49 g·mol<sup>-1</sup>, 0.09 mmol) and K<sub>2</sub>CO<sub>3</sub> (1.65 g, 138.20 g·mol<sup>-1</sup>, 11.94 mmol) were transferred to a 100 mL round flask. Then a mixed solvent of CH<sub>3</sub>CH<sub>2</sub>OH (24 mL) and H<sub>2</sub>O (8 mL) was added and the reaction was refluxed at 80 °C for 16 hours. The organic solvent was

concentrated by rotary evaporation. Next, the reaction mixture was extracted three times with DCM and H<sub>2</sub>O, removing residual water with Mg<sub>2</sub>SO<sub>4</sub>. Eventually, the crude product was purified by silica gel column using a mixture (ethyl acetate/petroleum ether, 1:80) as eluent to give *m*-TPA-Py in white solid form (yield: 82%). <sup>1</sup>H NMR (600 MHz, DMSO-*d*<sub>6</sub>) δ 8.83 (s, 1H), 8.49 (d, J = 4.3 Hz, 1H), 8.00 (d, J = 7.4 Hz, 1H), 7.63 (d, J = 8.5 Hz, 2H), 7.42 (dd, J = 7.6, 4.5 Hz, 1H), 7.31 (t, J = 7.8 Hz, 4H), 7.05 (td, J = 13.5, 12.7, 8.1 Hz, 8H). <sup>13</sup>C NMR (150 MHz, Chloroform-*d*) δ 148.05, 147.80, 147.77, 147.43, 136.19, 133.83, 131.16, 129.37, 127.76, 124.71, 123.54, 123.31.

### 1.3.4 *N,N*-diphenyl-4-(pyridin-4-yl)aniline (*p*-TPA-Py)<sup>[2]</sup>

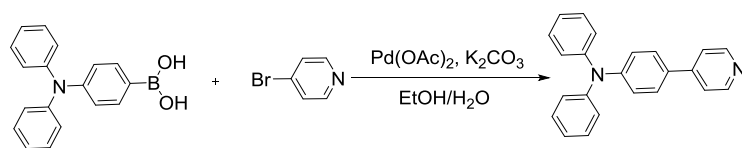

(4-(diphenylamino)phenyl)boronic acid (2.60 g, 289.14 g·mol<sup>-1</sup>, 8.99 mmol) and 3-bromopyridine (1.00 g, 158.00 g·mol<sup>-1</sup>, 6.33 mmol), Pd(OAc)<sub>2</sub> (20.00 mg, 224.49 g·mol<sup>-1</sup>, 0.09 mmol) and K<sub>2</sub>CO<sub>3</sub> (1.65 g, 138.20 g·mol<sup>-1</sup>, 11.94 mmol) were transferred to a 100 mL round-bottom flask. Then a mixed solvent of THF (25 mL) and CH<sub>3</sub>OH (25 mL) was added and the reaction was refluxed at 80 °C under N<sub>2</sub> for 18 hours. The reaction mixture was concentrated by rotary evaporation and the reactants were extracted three times with DCM and water, then the residual water was removed with Mg<sub>2</sub>SO<sub>4</sub>. The crude product was purified on a silica gel

column with mixed solvent (ethyl acetate: petroleum ether, 1:50) as eluent and *p*-TPA-Py was obtained as a white solid (yield: 85%). <sup>1</sup>H NMR (400 MHz, DMSO-*d*<sub>6</sub>) δ 8.81 (d, J = 6.5 Hz, 2H), 8.26 (d, J = 6.6 Hz, 2H), 7.95 (d, J = 8.8 Hz, 2H), 7.39 (t, J = 7.7 Hz, 4H), 7.17 (dd, J = 19.3, 7.5 Hz, 6H), 6.95 (d, J = 8.8 Hz, 2H). <sup>13</sup>C NMR (150 MHz, DMSO-*d*<sub>6</sub>) δ 154.83, 151.25, 146.24, 142.14, 130.42, 129.80, 126.35, 125.78, 125.51, 122.43, 120.40.

### 1.3.5 1-(4-benzoylbenzyl)-2-(4-(diphenylamino)phenyl)pyridin-1-ium (*o*-TPA-Pyr-BP)<sup>[3]</sup>

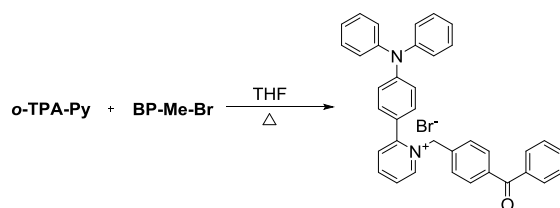

*o*-TPA-Py (0.25 g, 322.41 g·mol<sup>-1</sup>, 0.77 mmol), BP-Me-Br (0.26 g, 275.15 g·mol<sup>-1</sup>, 0.97 mmol) and THF (40 mL) were added to a 100 mL round bottom flask. Then, the mixture was refluxed at 80 °C for 36 hours. Afterwards, the crude product was precipitated from THF and washed several times with THF and *n*-hexane. A green solid powder (87%) was obtained. <sup>1</sup>H NMR (400 MHz, DMSO-*d*<sub>6</sub>) δ 9.41 (d, J = 6.0 Hz, 1H), 8.71 (t, J = 7.7 Hz, 1H), 8.22 (t, J = 6.4 Hz, 1H), 8.11 (d, J = 8.3 Hz, 1H), 7.65 (q, J = 10.1, 9.3 Hz, 5H), 7.51 (t, J = 7.7 Hz, 2H), 7.39 – 7.28 (m, 6H), 7.11 (dt, J = 12.9, 7.4 Hz, 8H), 6.91 (d, J = 8.7 Hz, 2H), 6.04 (s, 2H). <sup>13</sup>C NMR (150 MHz, DMSO-*d*<sub>6</sub>) δ 195.64, 155.65, 150.02, 147.50, 146.86, 146.51, 138.94, 137.20, 137.15, 133.39, 131.31, 130.86, 130.32, 130.30, 130.03, 129.07, 128.20, 127.33, 125.77, 125.03, 124.16, 120.77, 61.67. ESI<sup>+</sup>

HRMS  $m/z$  calcd for  $C_{37}H_{29}ON_2$  517.2257 [M].

### 1.3.6 1-(4-benzoylbenzyl)-3-(4-(diphenylamino)phenyl)pyridin-1-ium (*m*-TPA-Pyr-BP)<sup>[3]</sup>

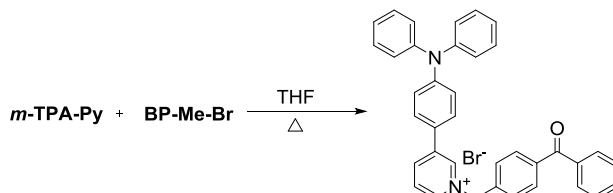

*m*-TPA-Py (0.25 g, 322.41  $g \cdot mol^{-1}$ , 0.77 mmol), BP-Me-Br (0.26 g, 275.15  $g \cdot mol^{-1}$ , 0.97 mmol) and THF (40 mL) were added to a 100 mL round-bottomed flask. Then, the mixture was refluxed at 80 °C for 36 hours. Afterwards, the crude product was precipitated from THF and washed several times with THF and *n*-hexane. A yellow solid powder (92%) was obtained. <sup>1</sup>H NMR (400 MHz, DMSO-*d*<sub>6</sub>)  $\delta$  9.72 (s, 1H), 9.12 (d,  $J = 6.0$  Hz, 1H), 8.93 – 8.84 (m, 1H), 8.26 – 8.17 (m, 1H), 7.83 (d,  $J = 8.7$  Hz, 2H), 7.77 (s, 4H), 7.69 (dd,  $J = 16.1, 7.3$  Hz, 3H), 7.54 (t,  $J = 7.6$  Hz, 2H), 7.36 (t,  $J = 7.9$  Hz, 4H), 7.10 (ddd,  $J = 22.7, 15.0, 8.1$  Hz, 8H), 6.03 (s, 2H). <sup>13</sup>C NMR (151 MHz, DMSO-*d*<sub>6</sub>)  $\delta$  195.68, 146.78, 142.77, 142.61, 142.48, 140.14, 139.00, 138.13, 137.04, 133.44, 130.70, 130.29, 130.11, 129.31, 129.10, 128.97, 125.81, 125.56, 124.79, 122.07, 63.23, 40.52. ESI<sup>+</sup> HRMS  $m/z$  calcd for  $C_{37}H_{29}ON_2$  517.2257 [M].

### 1.3.7 1-(4-benzoylbenzyl)-4-(4-(diphenylamino)phenyl)pyridin-1-ium (*p*-TPA-Pyr-BP)<sup>[3]</sup>

*p*-TPA-Py (0.25 g, 322.41  $g \cdot mol^{-1}$ , 0.77 mmol), BP-Me-Br (0.26 g, 275.15  $g \cdot mol^{-1}$ , 0.97 mmol) and THF (40 mL) were added to a 100 mL round



bottom flask. Then, the mixture was refluxed at 80 °C for 36 hours. After that, the crude product was precipitated from THF and washed several times with THF and *n*-hexane. A green solid powder (91%) was obtained. <sup>1</sup>H NMR (400 MHz, DMSO-*d*<sub>6</sub>) δ 9.12 (d, J = 7.0 Hz, 2H), 8.41 (d, J = 7.0 Hz, 2H), 8.00 (d, J = 9.0 Hz, 2H), 7.78 (d, J = 8.3 Hz, 2H), 7.70 (t, J = 7.9 Hz, 5H), 7.55 (t, J = 7.6 Hz, 2H), 7.41 (t, J = 7.8 Hz, 4H), 7.20 (dd, J = 19.0, 7.9 Hz, 6H), 6.94 (d, J = 8.9 Hz, 2H), 5.90 (s, 2H). <sup>13</sup>C NMR (150 MHz, DMSO-*d*<sub>6</sub>) δ 195.69, 154.63, 151.80, 145.99, 144.89, 139.34, 138.03, 137.07, 133.44, 130.73, 130.48, 130.20, 130.11, 129.11, 129.09, 126.62, 125.85, 123.36, 119.80, 61.78. ESI<sup>+</sup> HRMS *m/z* calcd for C<sub>37</sub>H<sub>29</sub>ON<sub>2</sub> 517.2281 [M].

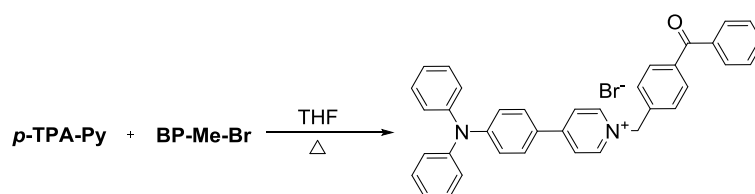

### 1.3.8 *p*-TPA-Pyr-BP/PF<sub>6</sub><sup>-</sup>[4]

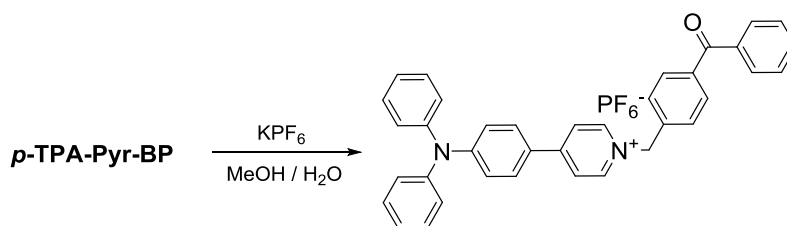

*p*-TPA-Pyr-BP (100.00 mg, 597.12 g·mol<sup>-1</sup>, 0.17 mmol) was added to a 10 mL glass vial, then 1 mL of methanol was added to dissolve it completely, after that 9 mL of ultrapure water was added to the glass vial. After the solution was homogeneously mixed, KPF<sub>6</sub> (36.81 mg, 184.06 g·mol<sup>-1</sup>, 0.20

mmol) was added to it and it was observed under UV light that the solution instantly turned red and a reddish-brown precipitate was produced. After standing for 2 hours, the solution became clear and transparent and a reddish-brown precipitate was formed at the bottom. The crude product was washed five times with ultrapure water to obtain a reddish-brown solid (95% yield).  $^1\text{H}$  NMR (400 MHz,  $\text{DMSO-}d_6$ )  $\delta$  9.06 (d,  $J = 6.8$  Hz, 2H), 8.39 (d,  $J = 6.7$  Hz, 2H), 7.98 (d,  $J = 8.9$  Hz, 2H), 7.79 (d,  $J = 8.1$  Hz, 2H), 7.69 (dd,  $J = 20.4, 7.6$  Hz, 5H), 7.55 (t,  $J = 7.5$  Hz, 2H), 7.42 (t,  $J = 7.8$  Hz, 4H), 7.24 - 7.16 (m, 6H), 6.95 (d,  $J = 8.8$  Hz, 2H), 5.85 (s, 2H).  $^{13}\text{C}$  NMR (151 MHz,  $\text{DMSO-}d_6$ )  $\delta$  195.68, 154.68, 145.99, 144.88, 139.29, 138.05, 133.44, 130.75, 130.48, 130.18, 130.11, 129.11, 129.03, 126.63, 125.86, 124.58, 123.36, 119.82, 61.92. ESI<sup>+</sup> HRMS  $m/z$  calcd for  $\text{C}_{37}\text{H}_{29}\text{ON}_2$  518.2280 [M].

## 2.RESULTS

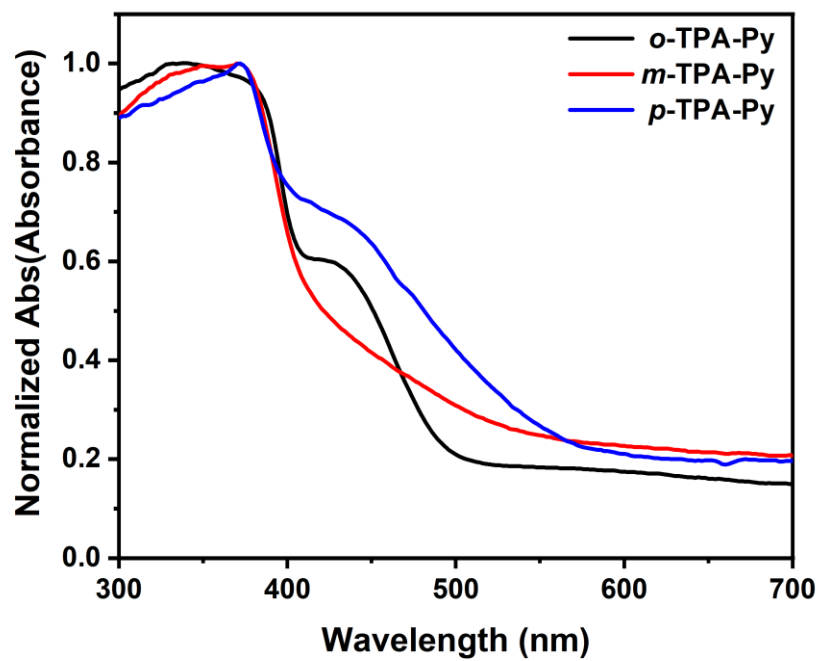

**Figure. S1** The normalized solid-state absorption spectra of *o*-, *m*-, *p*-TPA-Py in solid state at 25 °C.

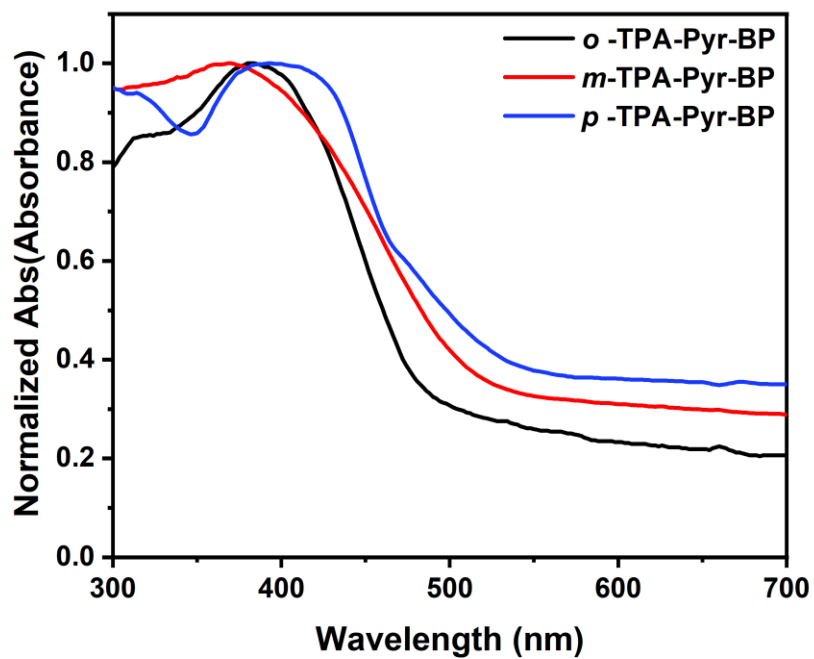

**Figure. S2** The normalized solid-state absorption spectra of *o*-, *m*-, *p*-TPA-Pyr-BP in solid state at 25 °C.

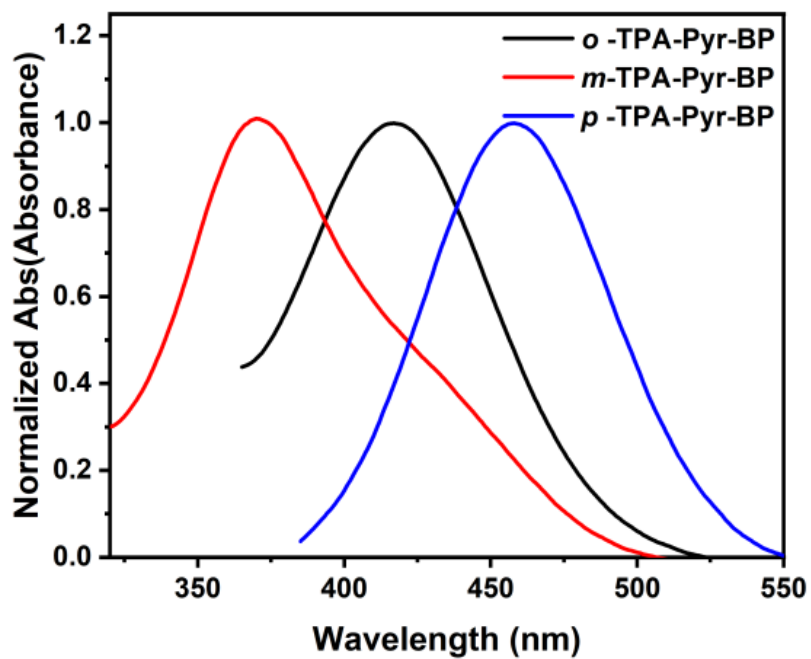

**Figure. S3** Normalized absorption spectra of *o*-, *m*-, *p*-TPA-Pyr-BP in solvent of DCM (Conc. = 5  $\mu$ M) at 25  $^{\circ}$ C. ( $\lambda_{ab}$  = 417, 371 and 457 nm, respectively.)

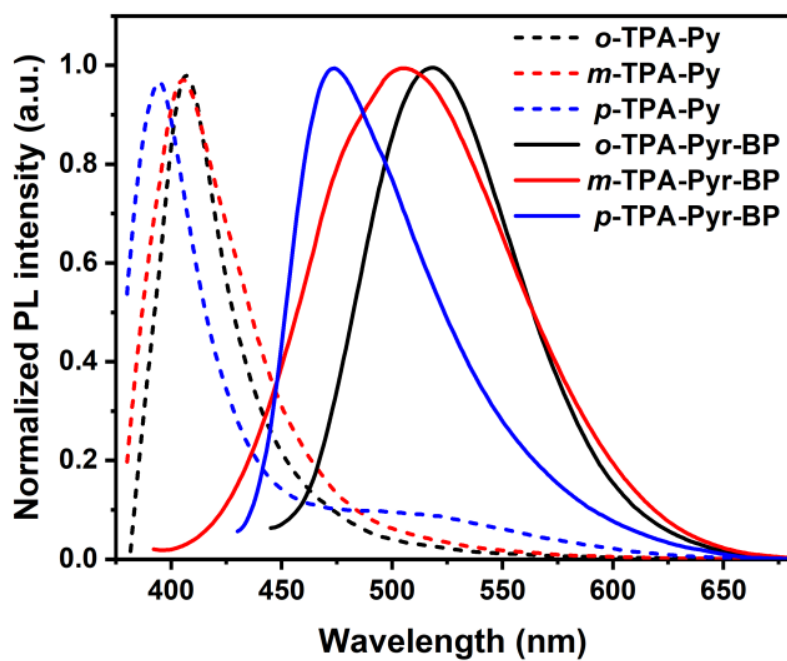

**Figure. S4** Fluorescence spectra of *o*-, *m*-, *p*-TPA-Py and *o*-, *m*-, *p*-TPA-Pyr-BP in solid-state at 25 °C. ( $\lambda_{\text{ex}}$  = 330, 350, 350, 385 370, and 395 nm, respectively.)

**Table S1.** The photophysical properties and sensing capability to PF<sub>6</sub><sup>-</sup> of *o*-, *m*- and *p*-TPA-Pyr-BP

| Samples              | $\lambda_{ab}$<br>(solid state) | $\lambda_{ab}$<br>(DCM) | $\lambda_{em}$<br>(before grinding) | $\lambda_{em}$<br>(after grinding) | $\Delta_{values}$ | $\phi_F$ | $\langle T_F \rangle$ | PF <sub>6</sub> <sup>-</sup> sensing capability |
|----------------------|---------------------------------|-------------------------|-------------------------------------|------------------------------------|-------------------|----------|-----------------------|-------------------------------------------------|
| <i>o</i> -TPA-Pyr-BP | 385 nm                          | 417 nm                  | 512 nm                              | 559 nm                             | 47 nm             | 68%      | 8.20 ns               | poor                                            |
| <i>m</i> -TPA-Pyr-BP | 370 nm                          | 371 nm                  | 490 nm                              | 566 nm                             | 76 nm             | 63%      | 5.16 ns               | average                                         |
| <i>p</i> -TPA-Pyr-BP | 395 nm                          | 458 nm                  | 479 nm                              | 600 nm                             | 121 nm            | 78%      | 2.97 ns               | excellent                                       |

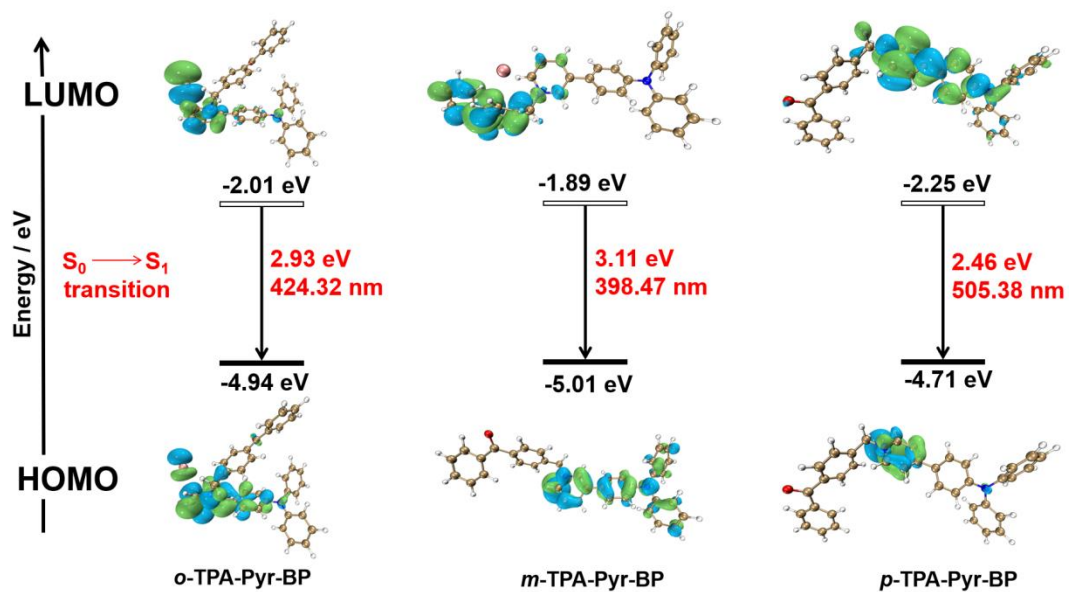

**Figure. S5** Molecular orbital energy diagrams for *o*-, *m*-, *p*-TPA-Pyr-BP at B3LYP/6-31G(d) by Gaussian 09.



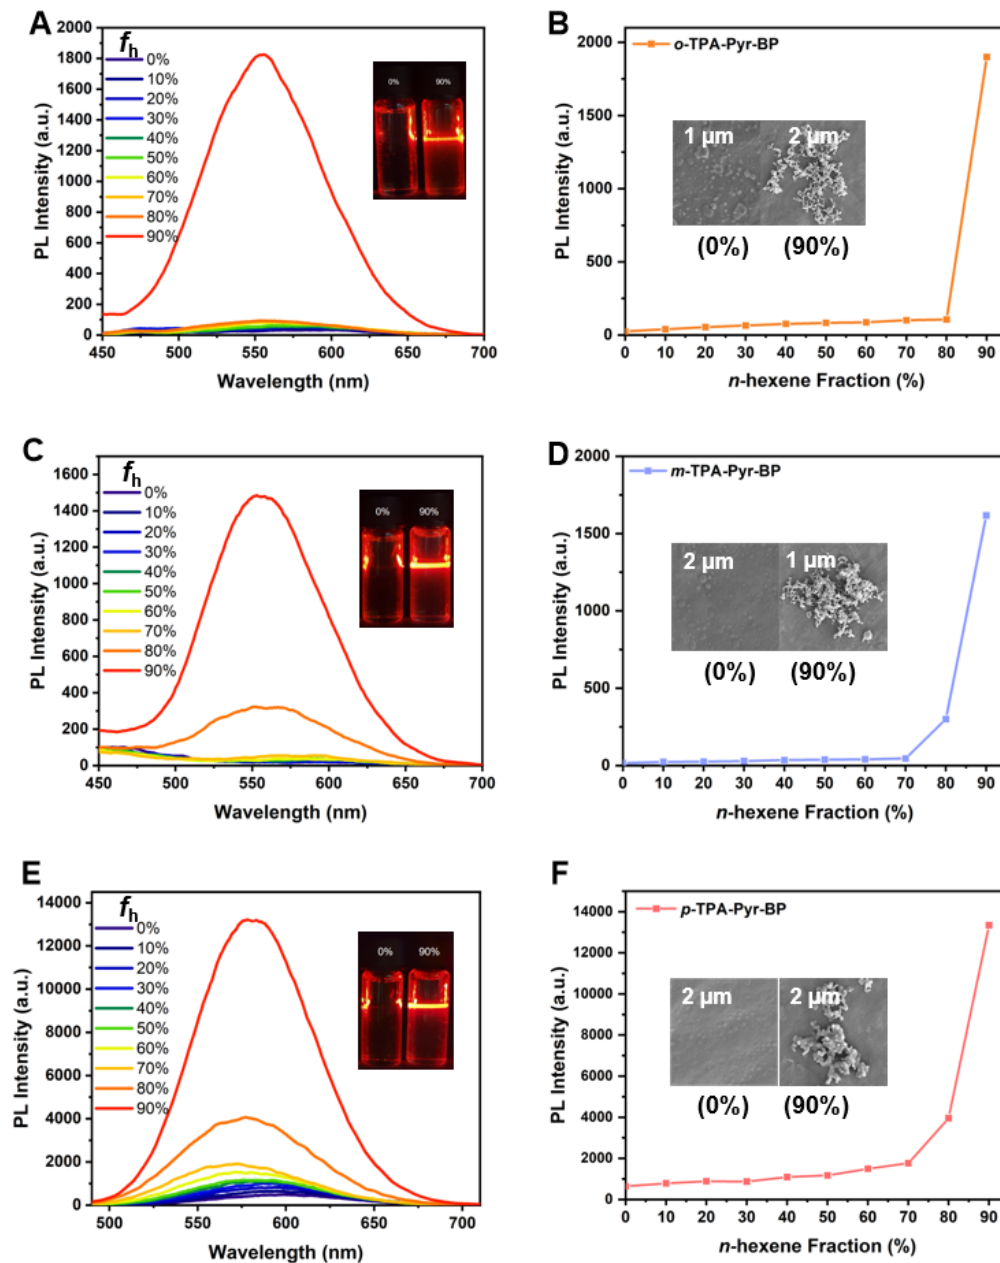

**Figure. S6** PL spectra of *o*-TPA-Pyr-BP (A), *m*-TPA-Pyr-BP (B), *p*-TPA-Pyr-BP (C) (50  $\mu\text{M}$ ) in DCM solution with different fractions of *n*-hexane. (Inset: Tyndale effect at  $f_h = 0\%$  and  $90\%$ ); Fluorescence line graphs of *o*-TPA-Pyr-BP (B), *m*-TPA-Pyr-BP (D), *p*-TPA-Pyr-BP (F) at different *n*-hexane concentrations (Inset: SEM images at  $f_h = 0\%$  and  $90\%$ ). ( $\lambda_{\text{em}} = 420, 400$  and  $460$  nm, respectively.)

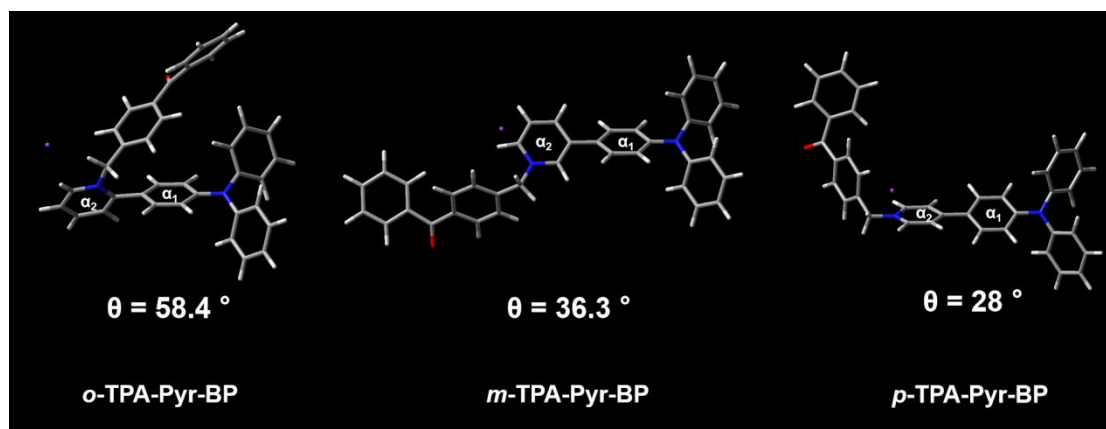

**Figure. S7** The torsion angel ( $\theta$ ) between the benzene ring in triphenylamine (TPA) and the adjacent pyridine of *o*-, *m*-, *p*-TPA-Pyr-BP under their optimal conformation.

**Table S2.** Crystal data of *m*-TPA-Pyr-BP and *p*-TPA-Pyr-BP.

| Name                                                                        | <i>m</i> -TPA-Pyr-BP                                                | <i>p</i> -TPA-Pyr-BP                               |
|-----------------------------------------------------------------------------|---------------------------------------------------------------------|----------------------------------------------------|
| Formula                                                                     | C <sub>37</sub> H <sub>29</sub> N <sub>2</sub> OBr·H <sub>2</sub> O | C <sub>37</sub> H <sub>29</sub> N <sub>2</sub> OBr |
| Wavelength(Å)                                                               | 1.54184                                                             | 1.54184                                            |
| Space Group                                                                 | P b c a                                                             | P 21/a                                             |
| Cell Lengths (Å)                                                            | <b>a</b> 15.1563 (2)                                                | <b>a</b> 9.1969 (3)                                |
|                                                                             | <b>b</b> 9.8883 (1)                                                 | <b>b</b> 17.9584 (4)                               |
|                                                                             | <b>c</b> 39.4971 (5)                                                | <b>c</b> 20.7468 (6)                               |
| Cell Angles (°)                                                             | <b>α</b> 90                                                         | <b>α</b> 90                                        |
|                                                                             | <b>β</b> 90                                                         | <b>β</b> 100.438 (3)                               |
|                                                                             | <b>γ</b> 90                                                         | <b>γ</b> 90                                        |
| Cell Volume (Å <sup>3</sup> )                                               | 5919.43 (12)                                                        | 3369.91 (17)                                       |
| Z                                                                           | 8                                                                   | 4                                                  |
| Density (g/cm <sup>3</sup> )                                                | 1.381                                                               | 1.178                                              |
| F(000)                                                                      | 2544.0                                                              | 1232.0                                             |
| <b>h</b> <sub>max</sub> , <b>k</b> <sub>max</sub> , <b>l</b> <sub>max</sub> | 19,12,50                                                            | 11,21,25                                           |
| <b>R</b> (all data)                                                         | R <sub>1</sub> = 0.0402 (5572)                                      | R <sub>1</sub> = 0.0656 (4273)                     |
|                                                                             | wR <sub>2</sub> = 0.1041 (6173)                                     | wR <sub>2</sub> = 0.2194 (6295)                    |
| Temperature(K)                                                              | 150 K                                                               | 294 K                                              |
| CCDC                                                                        | 2363480                                                             | 2050015                                            |

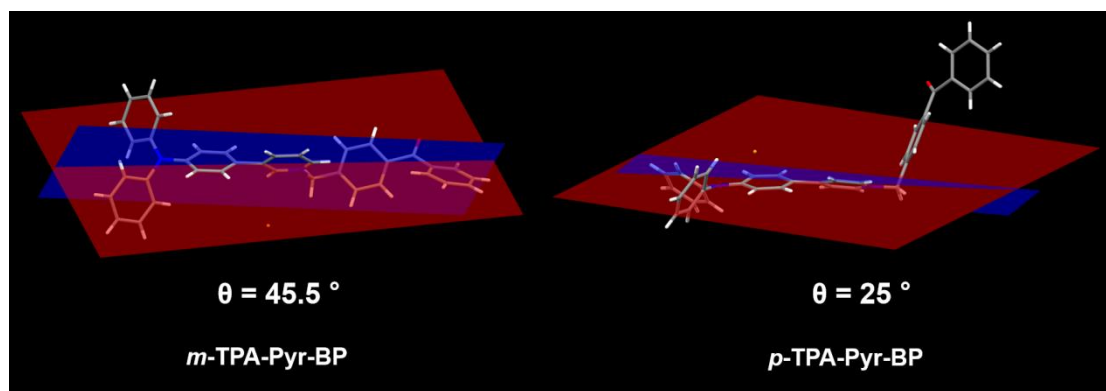

**Figure. S8** The torsion angel ( $\theta$ ) between the benzene ring in triphenylamine and the adjacent pyridine of *m*-TPA-Pyr-BP and *p*-TPA-Pyr-BP under their single crystal.

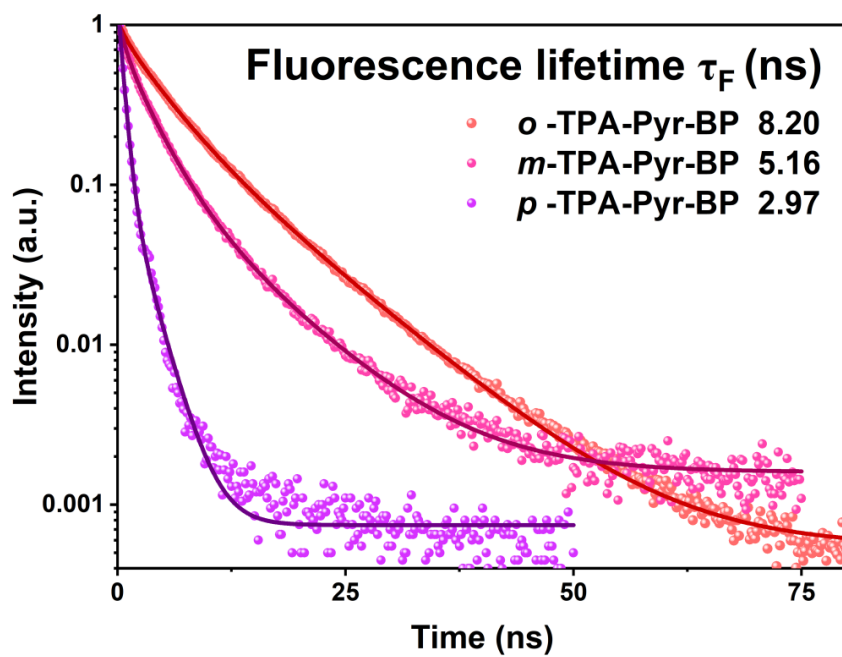

Figure. S9 Lifetime decay profiles of *o*-, *m*-, *p*-TPA-Pyr-BP in solid powders.

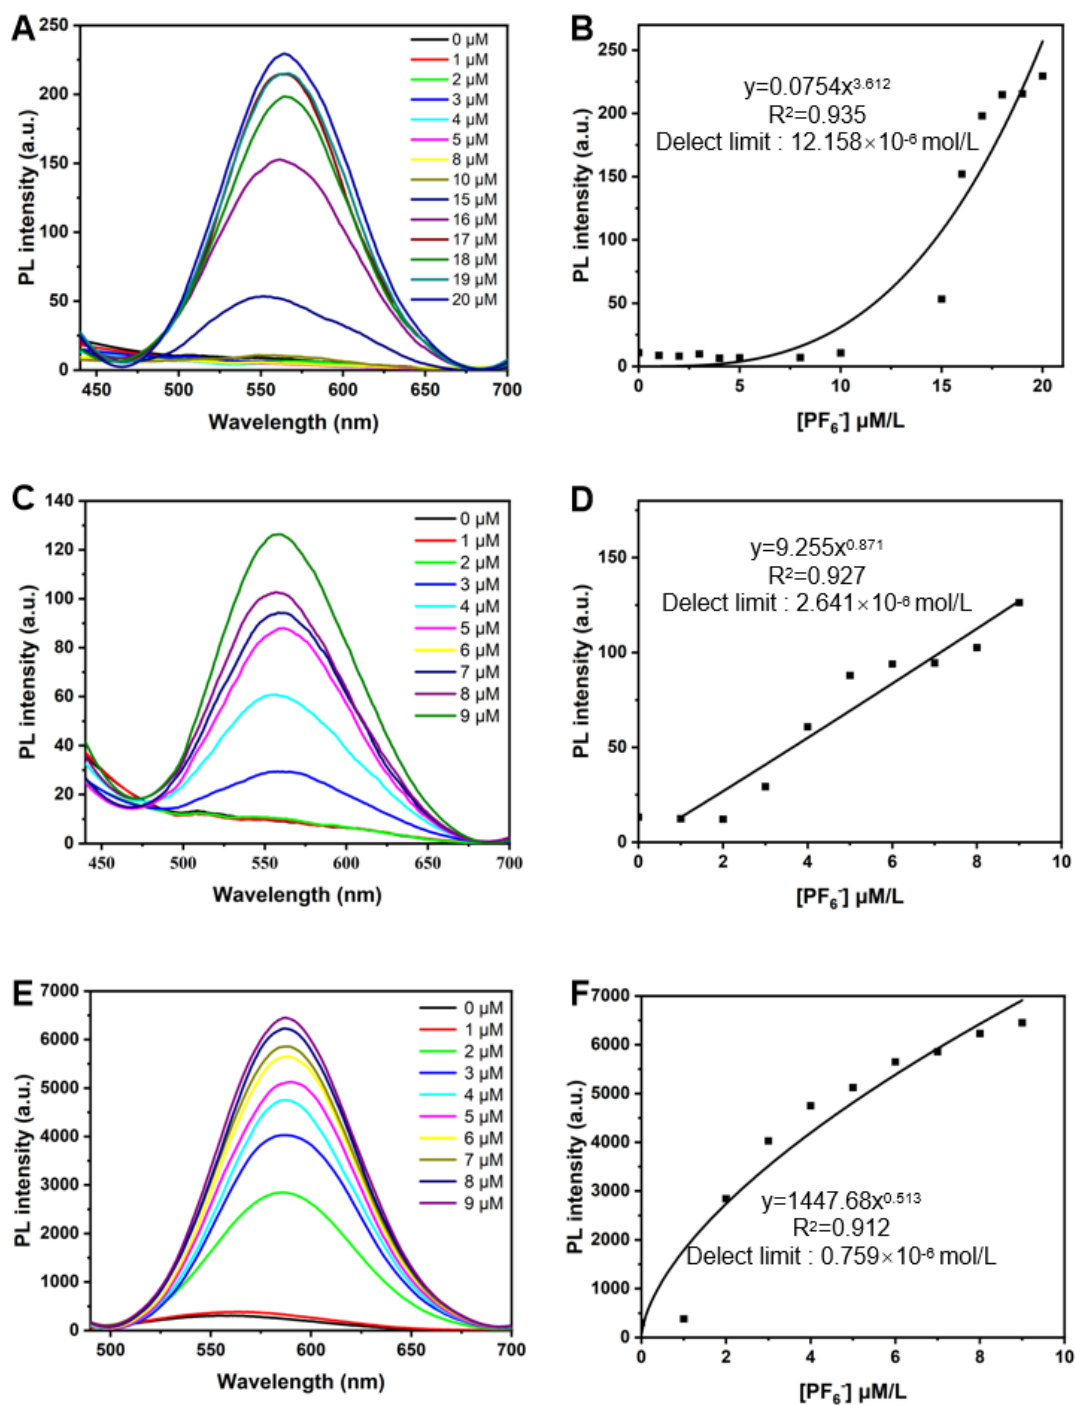

**Figure. S10** Plot of fluorescence intensity change of *o*-TPA-Pyr-BP (A), *m*-TPA-Pyr-BP (C), *p*-TPA-Pyr-BP (E) with various concentrations of PF<sub>6</sub><sup>-</sup> at 25 °C; The limit detection of *o*-TPA-Pyr-BP (B), *m*-TPA-Pyr-BP (D), *p*-TPA-Pyr-BP (F) were calculated by the formula (3σ/K) (Conc. = 10 μM, λ<sub>ex</sub> = 420, 400 and 460 nm, respectively.)

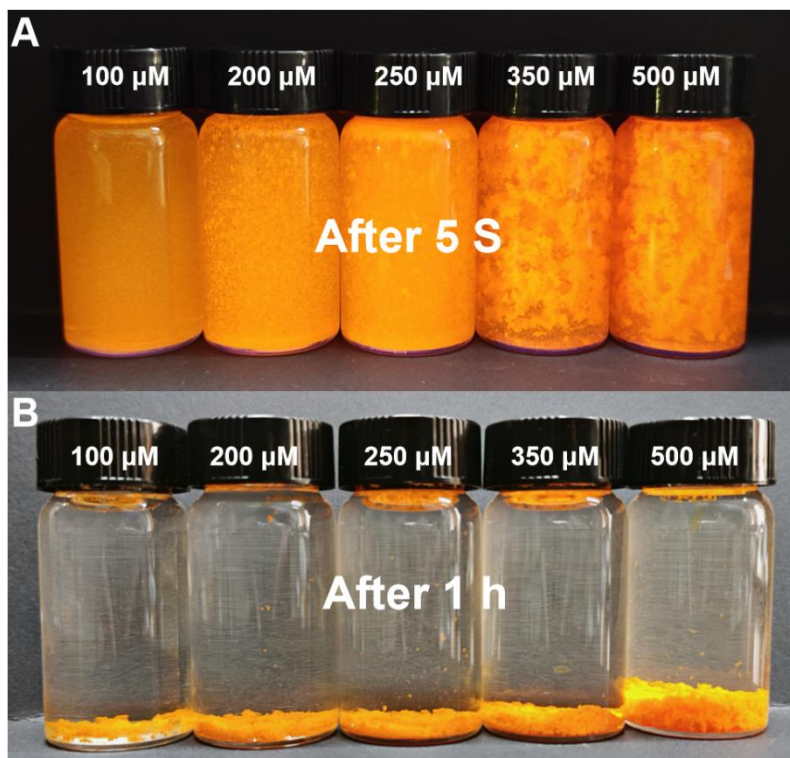

**Figure. S11** Sensing photographs of adding equal equivalents of  $\text{PF}_6^-$  to different concentrations of *p*-TPA-Pyr-BP (methanol: water = 1: 9, 20 mL); above: After adding  $\text{PF}_6^-$  to the solution for 5 seconds (**A**); bottom: After adding  $\text{PF}_6^-$  to the solution for 1 hour (**B**).

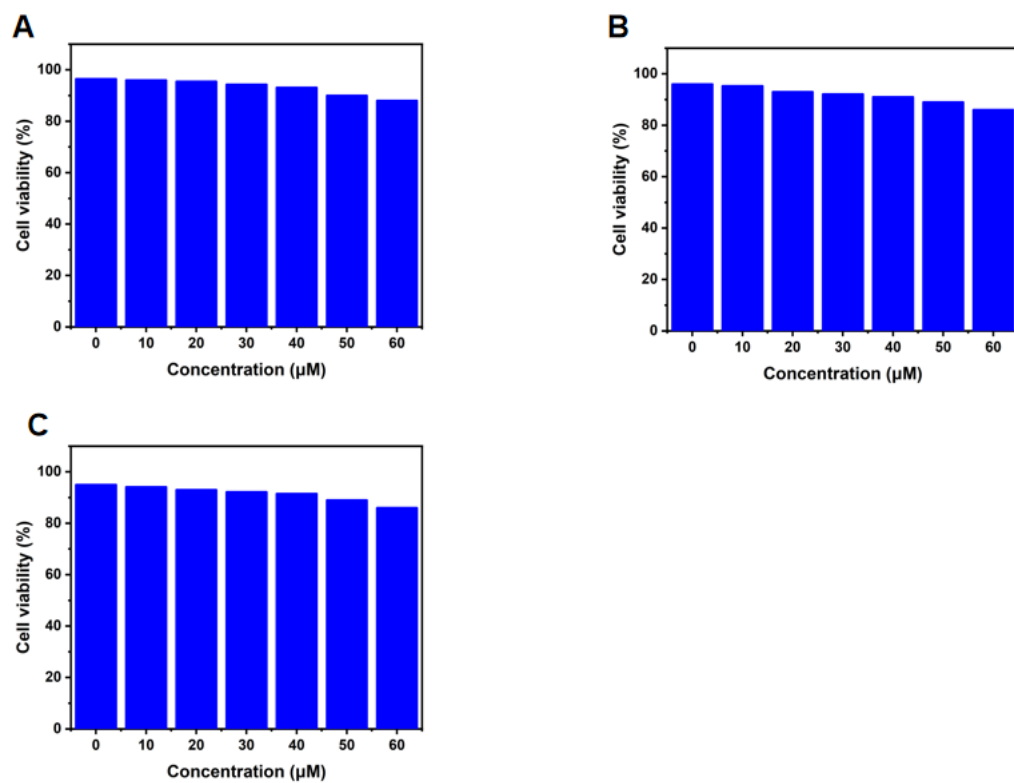

**Figure. S12** HeLa cells viability assessed by MTT assay of *o*-TPA-Pyr-BP (**A**), *m*-TPA-Pyr-BP (**B**), *p*-TPA-Pyr-BP (**C**) in various concentrations at 37 °C for 24 hours.



### 3. NMR data spectra

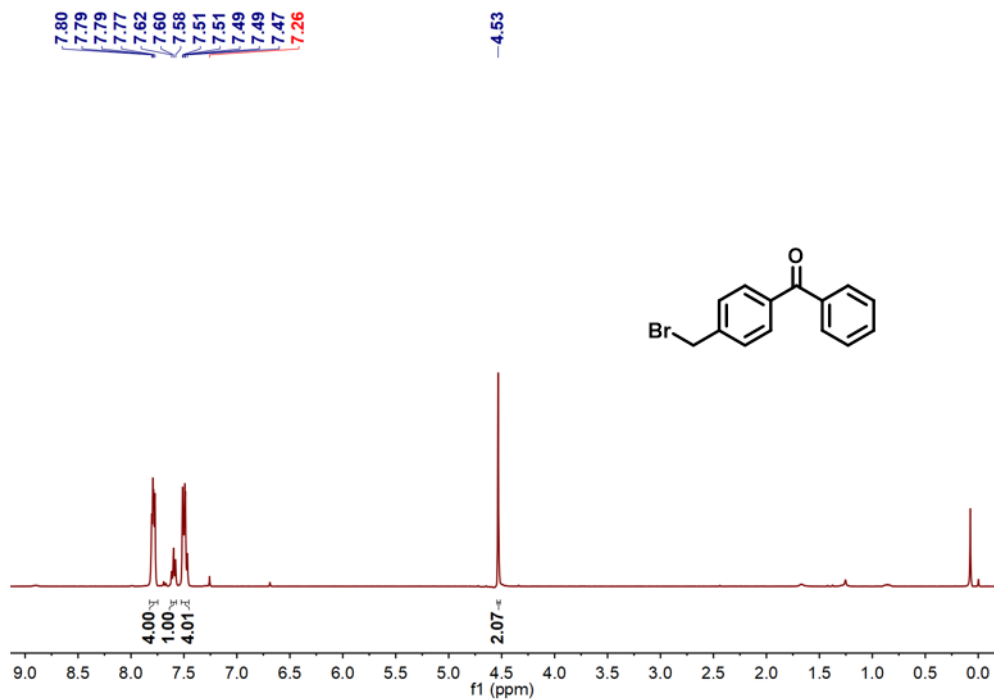

Figure. S13  $^1\text{H}$  NMR spectra of BP-Me-Br in  $\text{CDCl}_3$ .

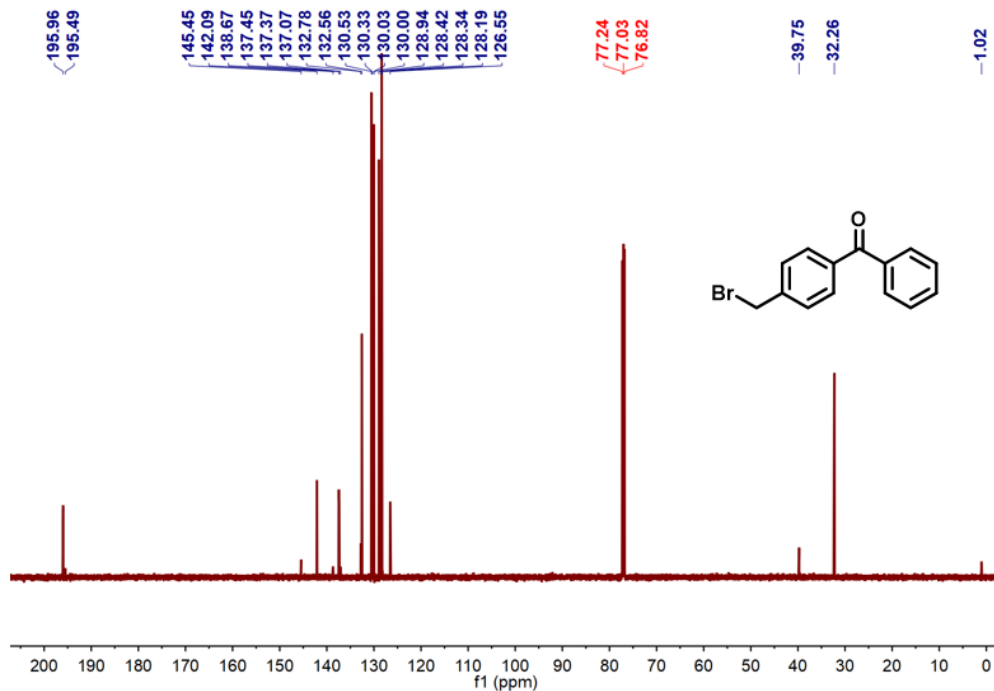

Figure. S14  $^{13}\text{C}$  NMR spectra of BP-Me-Br in  $\text{CDCl}_3$ .

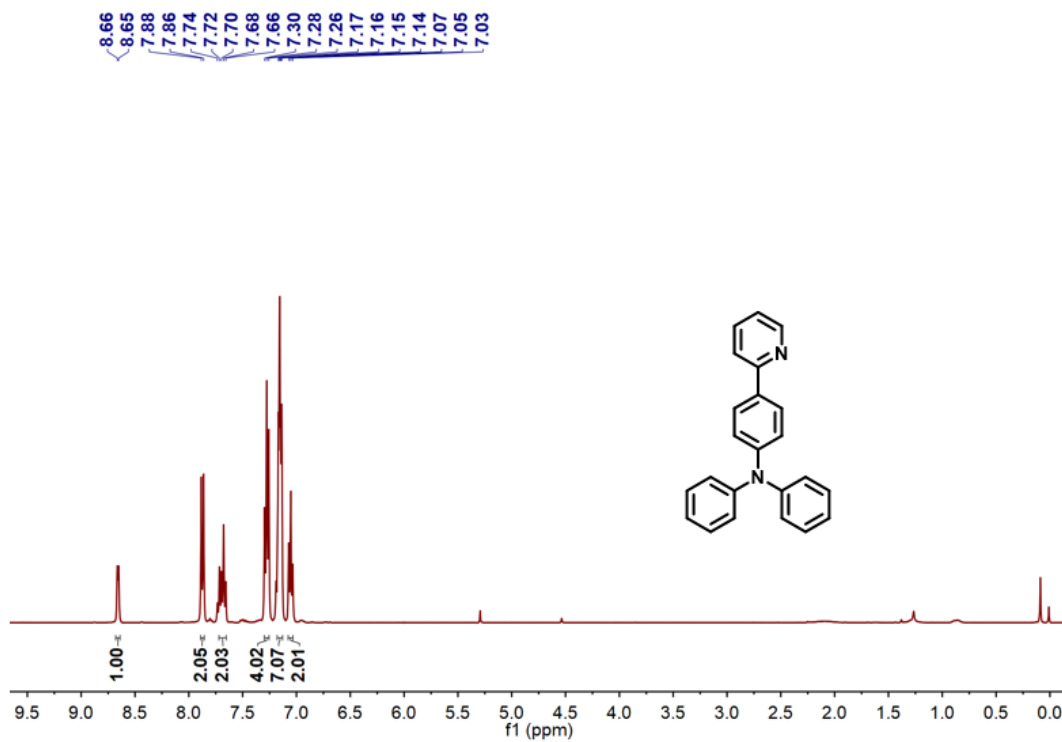

Figure. S15  $^1\text{H}$  NMR spectra of *o*-TPA-Py in  $\text{CDCl}_3$ .

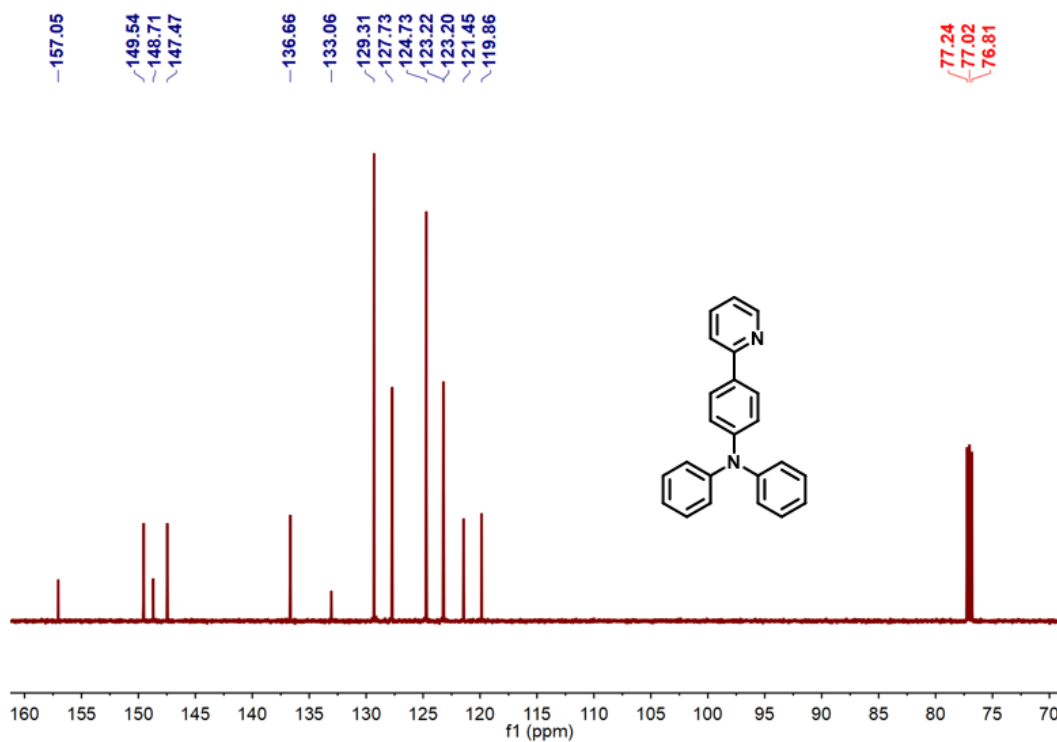

Figure. S16  $^{13}\text{C}$  NMR spectra of *o*-TPA-Py in  $\text{CDCl}_3$ .

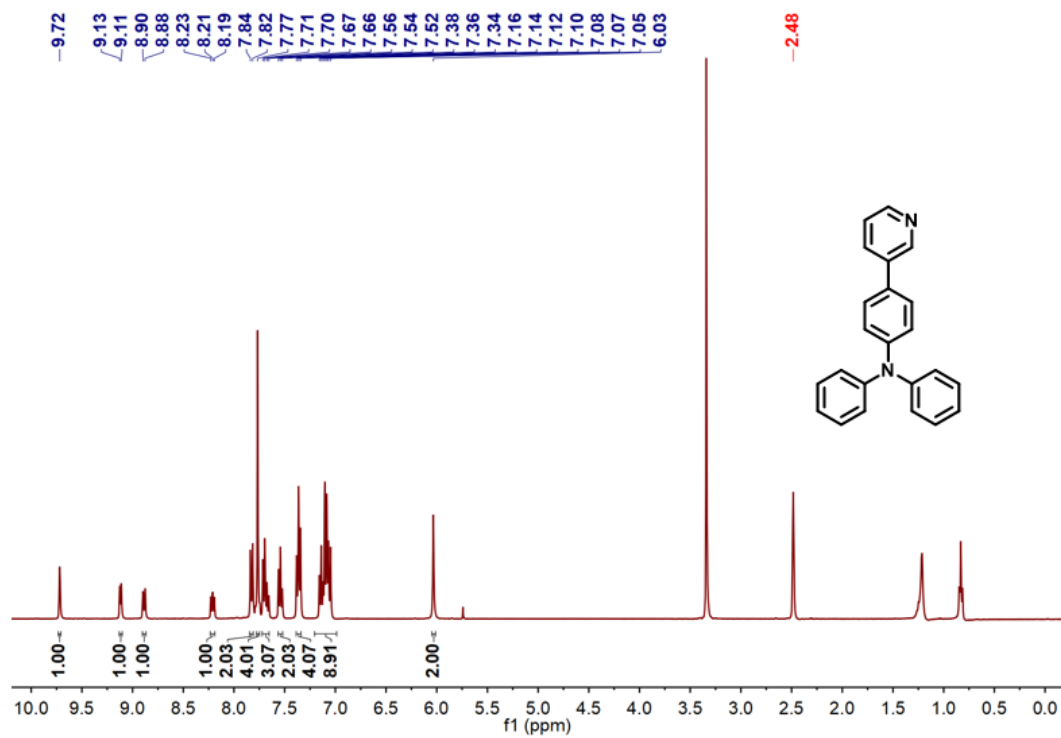

Figure. S17  $^1\text{H}$  NMR spectra of *m*-TPA-Py in  $\text{DMSO-}d_6$ .

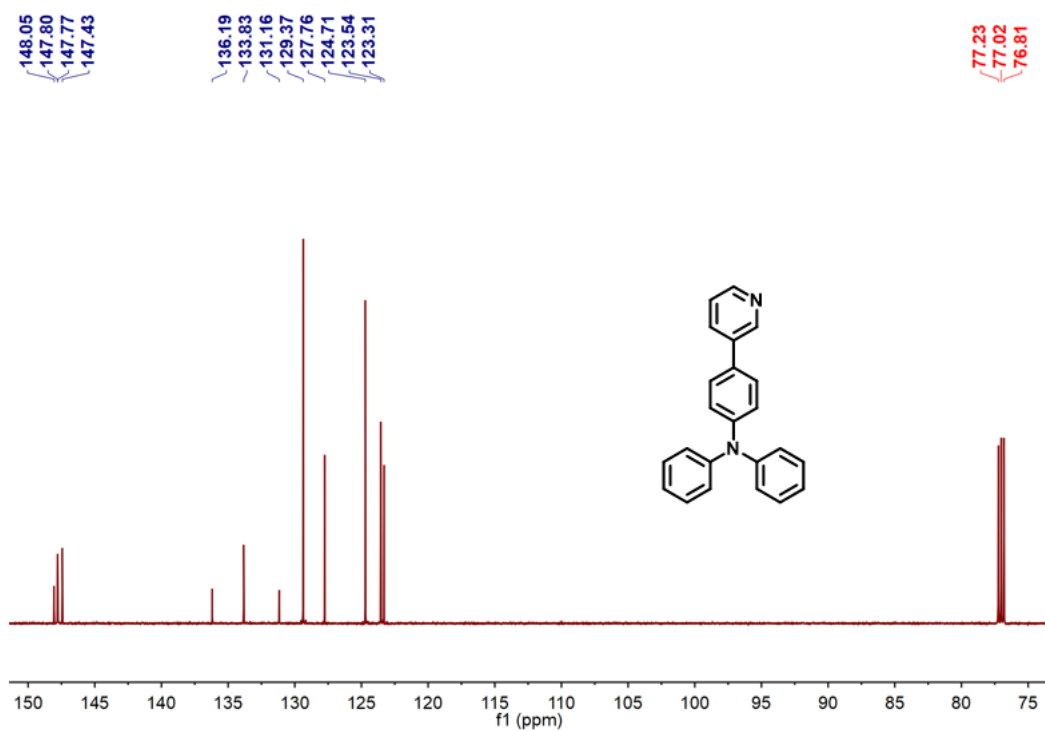

Figure. S18  $^{13}\text{C}$  NMR spectra of *m*-TPA-Py in  $\text{CDCl}_3$ .

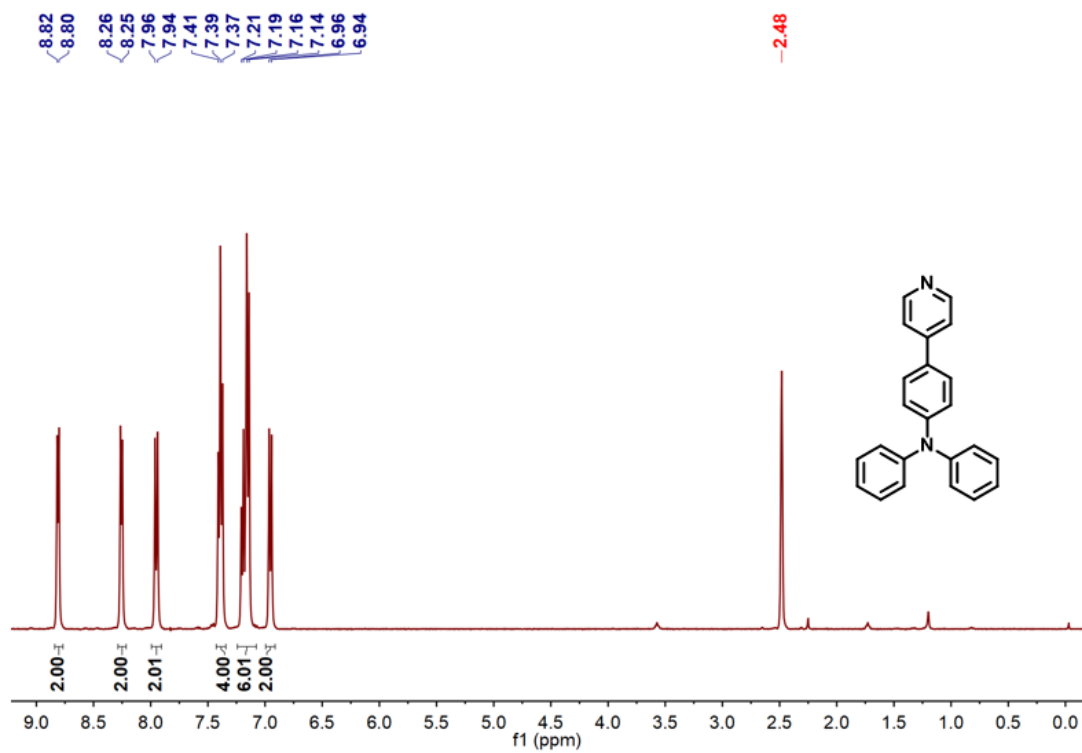

Figure. S19  $^1\text{H}$  NMR spectra of *p*-TPA-Py in  $\text{DMSO-}d_6$ .

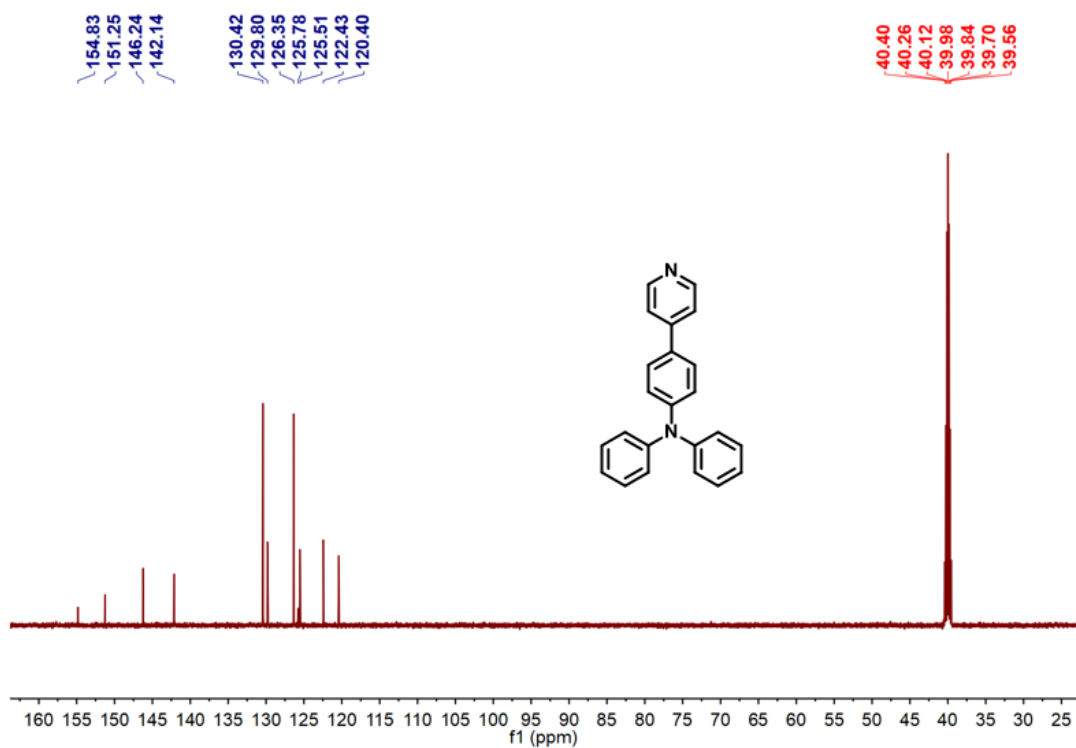

Figure. S20  $^{13}\text{C}$  NMR spectra of *p*-TPA-Py in  $\text{DMSO-}d_6$ .



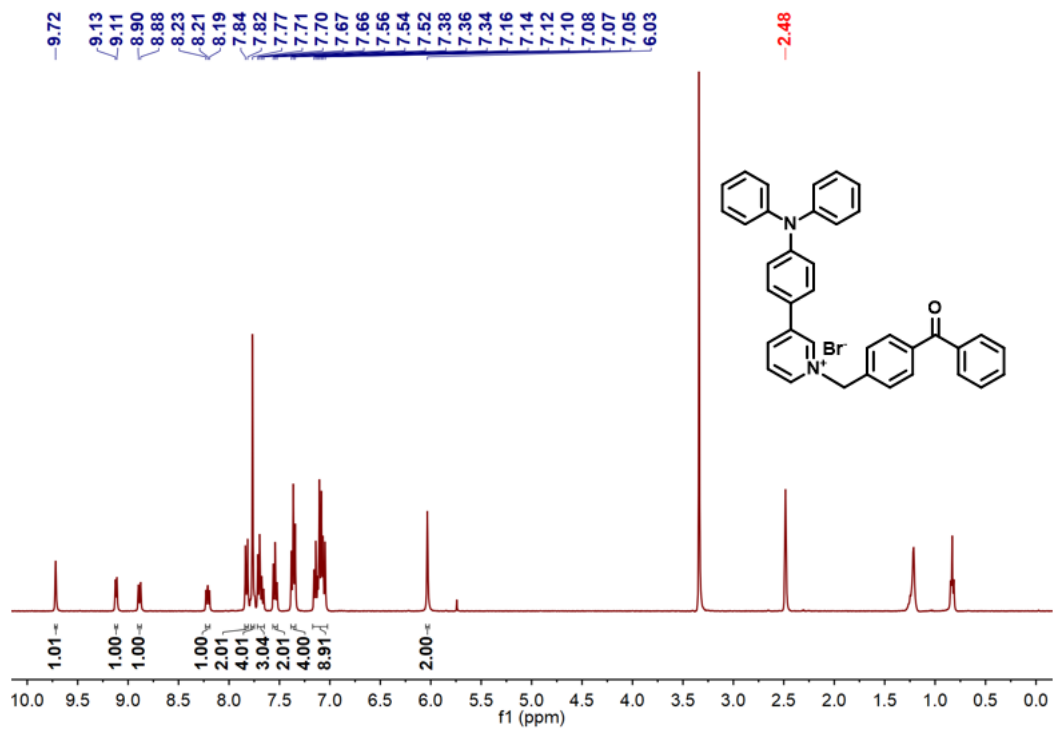

Figure. S23  $^1\text{H}$  NMR spectra of *m*-TPA-Pyr-BP in  $\text{DMSO-}d_6$ .

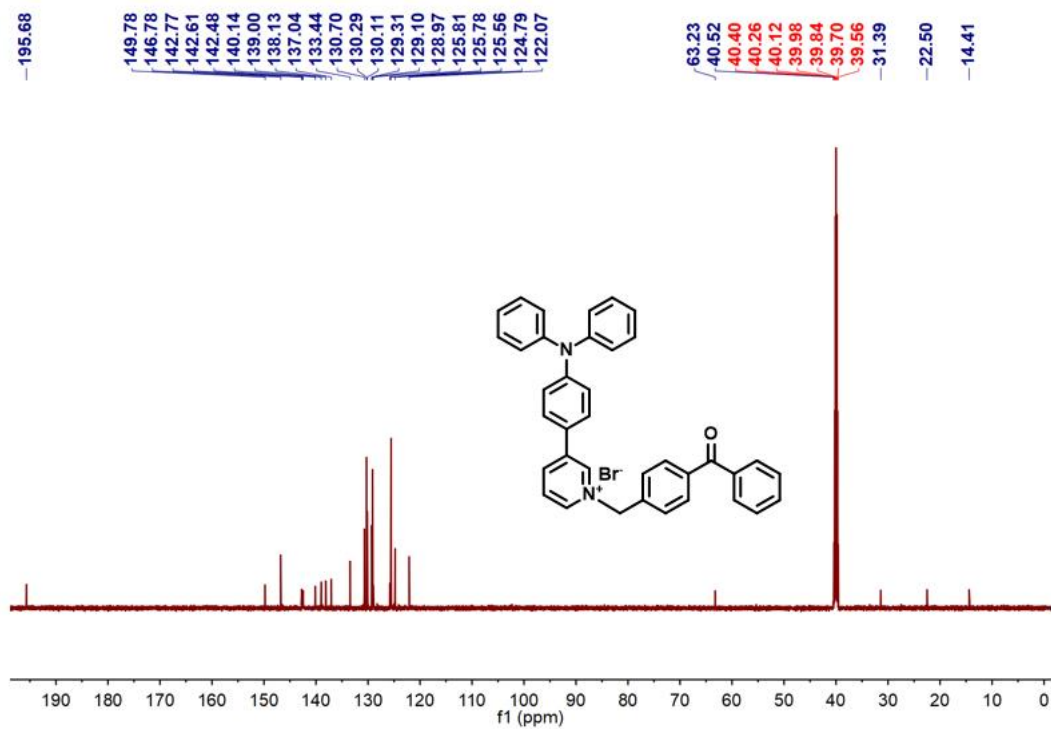

Figure. S24  $^{13}\text{C}$  NMR spectra of *m*-TPA-Pyr-BP in  $\text{DMSO-}d_6$ .

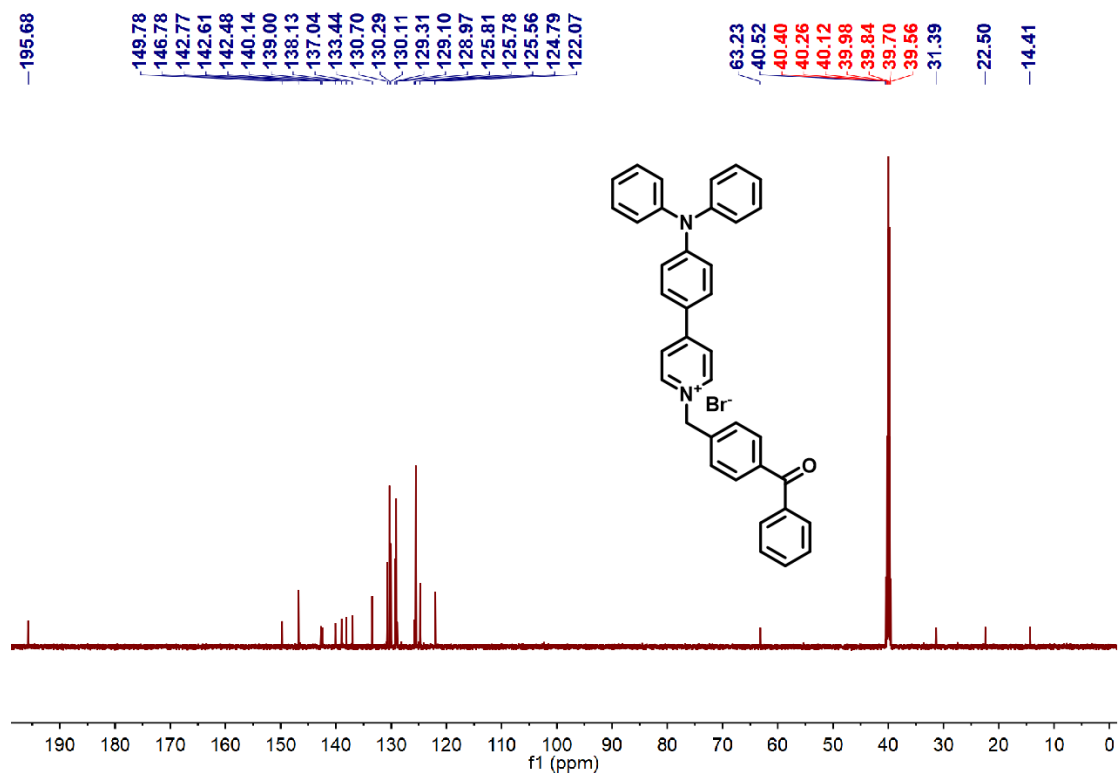

Figure. S25 <sup>13</sup>C NMR spectra of *p*-TPA-Pyr-BP in DMSO-*d*<sub>6</sub>.

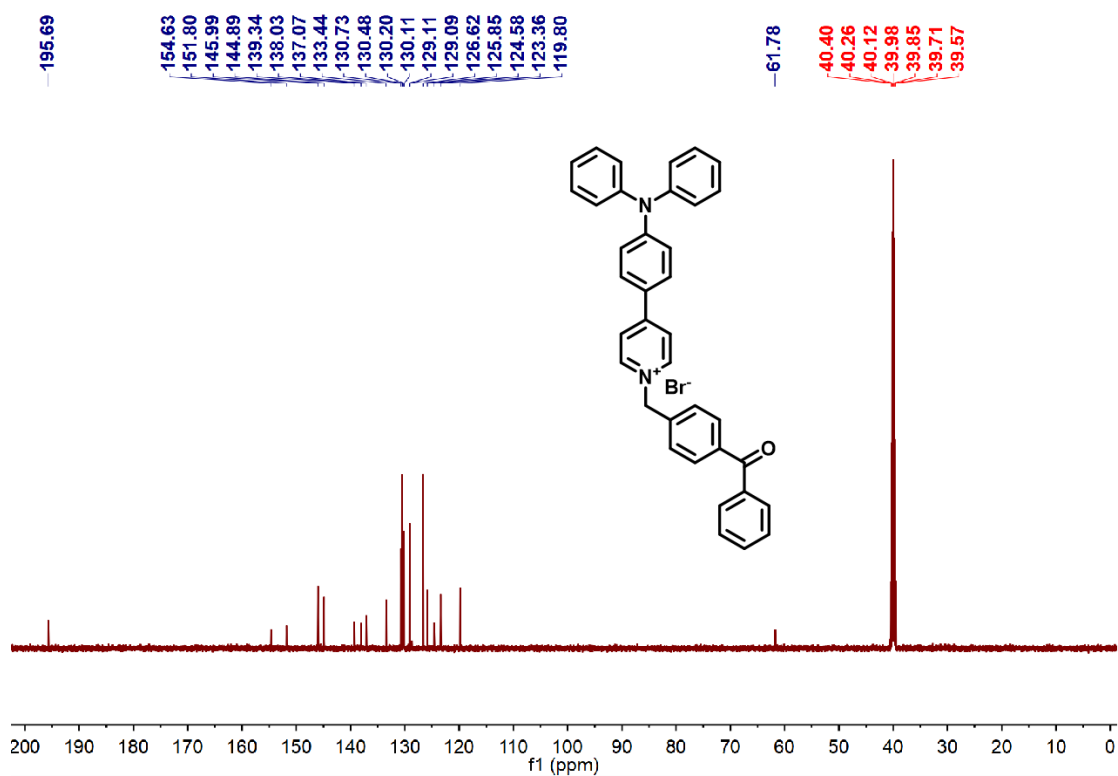

Figure. S26 <sup>13</sup>C NMR spectra of *p*-TPA-Pyr-BP in DMSO-*d*<sub>6</sub>.

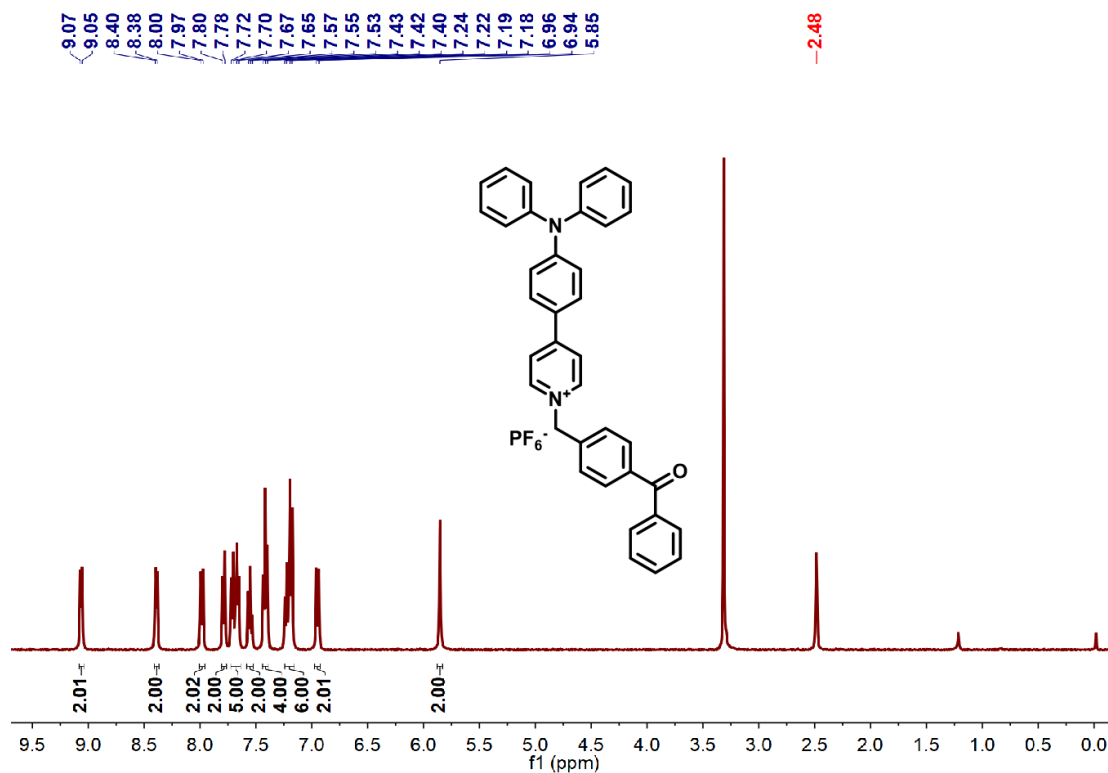

Figure. S27 <sup>1</sup>H NMR spectra of *p*-TPA-Pyr-BP (PF<sub>6</sub><sup>-</sup>) in DMSO-*d*<sub>6</sub>.

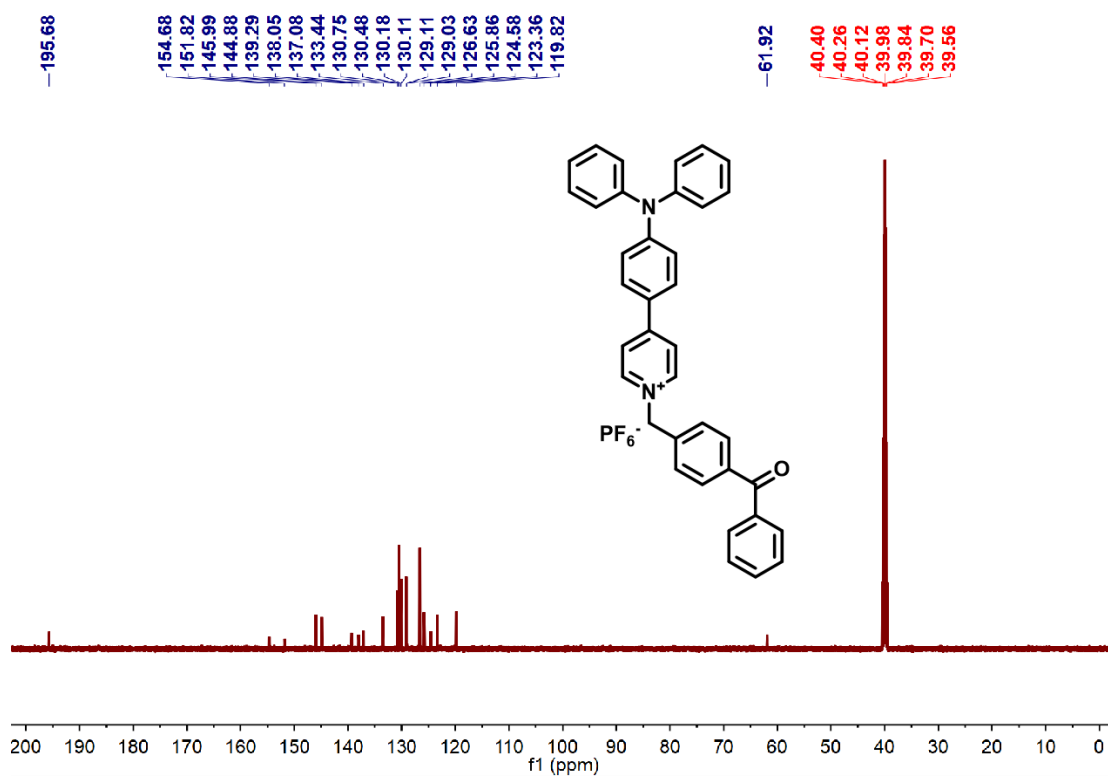

Figure. S28 <sup>13</sup>C NMR spectra of *m*-TPA-Pyr-BP (PF<sub>6</sub><sup>-</sup>) in DMSO-*d*<sub>6</sub>.



#### 4. HRMS date spectra

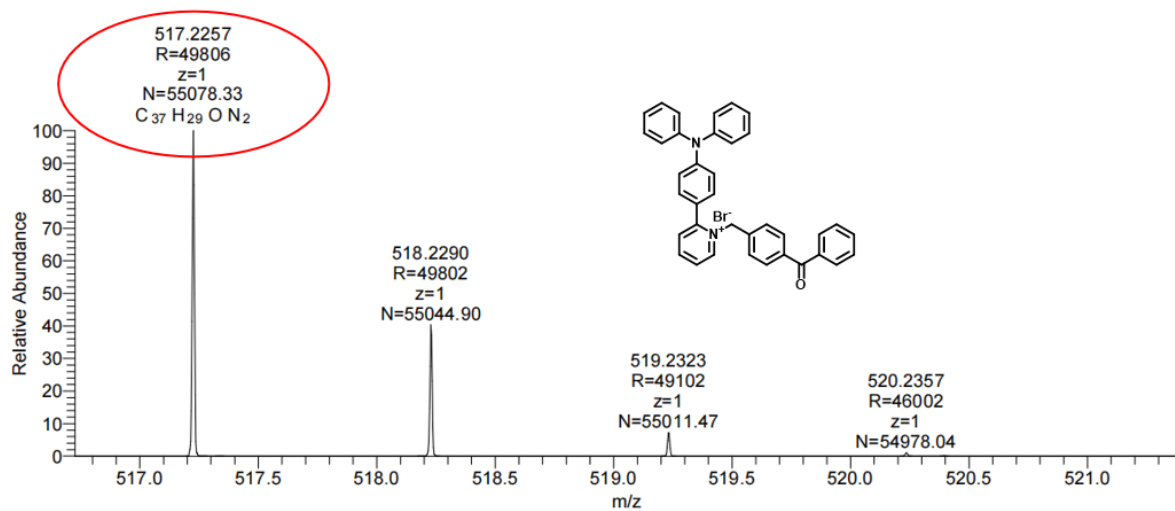

Figure. S29 HRMS spectra of *o*-TPA-Pyr-BP.

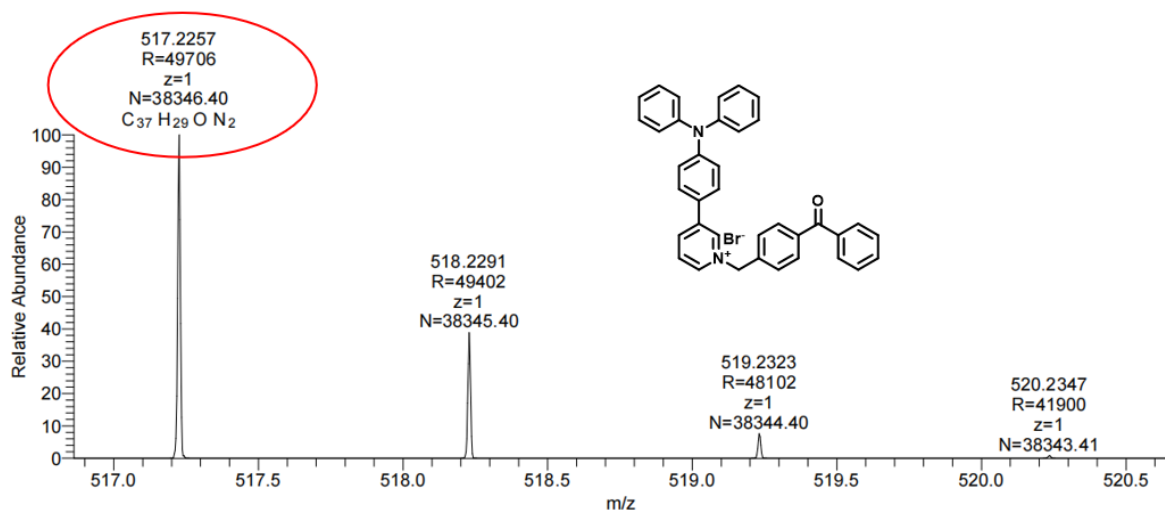

Figure. S30 HRMS spectra of *m*-TPA-Pyr-BP.

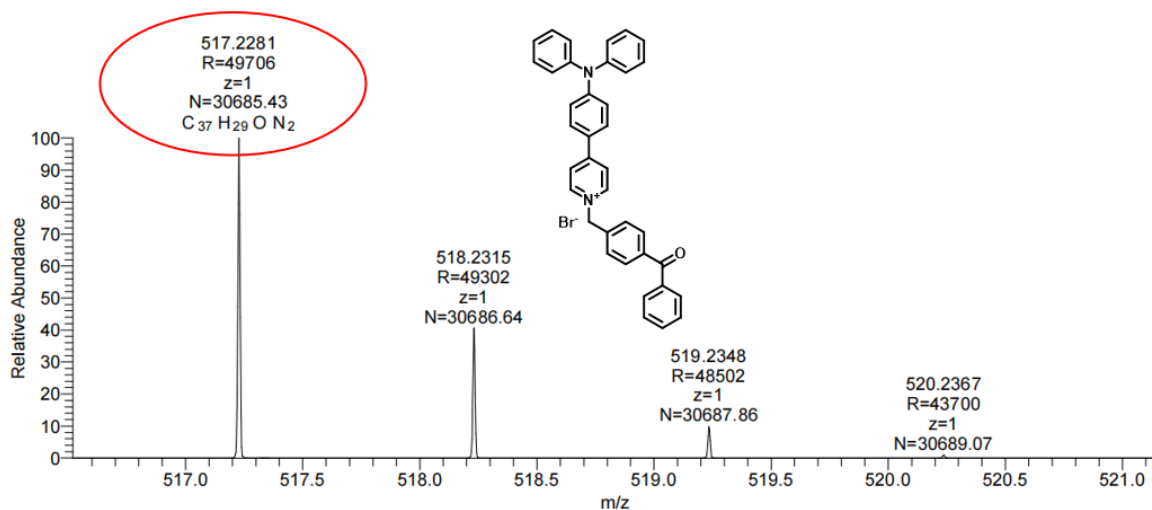

Figure. S31 HRMS spectra of *p*-TPA-Pyr-BP.

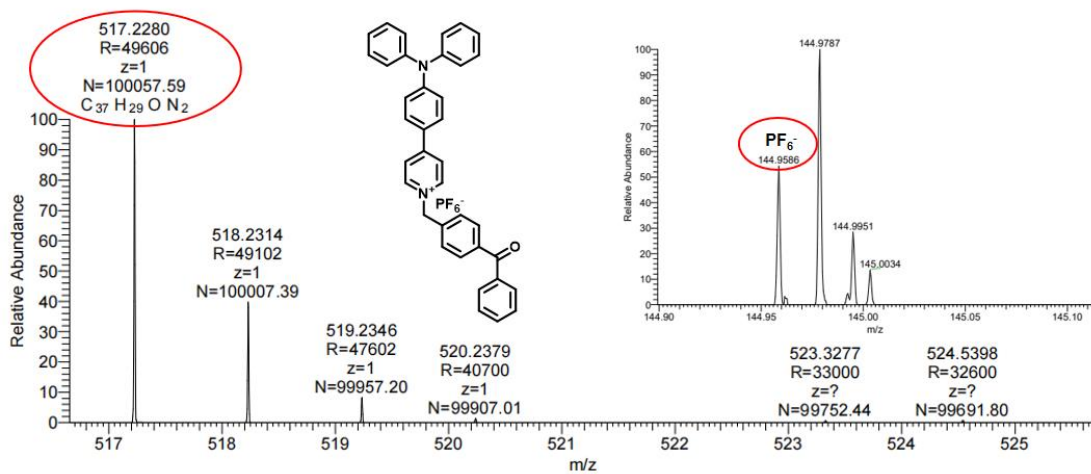

Figure. S32 HRMS spectra of *p*-TPA-Pyr-BP/PF<sub>6</sub><sup>-</sup>.

## 5. REFERENCES

- [1] Liu, R. Y.; Zhang, P. W.; Gan, Tong, Cook, James M. Regiospecific Bromination of 3-Methylindoles with NBS and Its Application to the Concise Synthesis of Optically Active Unusual Tryptophans Present in Marine Cyclic Peptides. *J. Org. Chem.*, 1997, **62**, 7447-7456.
- [2] Yin, W. D.; Yang, Z. M.; Yang, Y.; Li, X. X.; Li, Z.; Zhang, B.; Zhang, S. J.; Han, B. Y.; Ma, H. C. A positively charged aggregation-induced emission (AIE) luminogen as an ultra-sensitive mechanochromic luminescent material: design, synthesis and versatile applications. *Mater. Chem. Front.*, 2021, **5**, 2849.
- [3] Ma, H. C.; Yang, Z. M.; Cao, H. Y.; Lei, L.; Chang, L.; Ma, Y. C.; Yang, M. Y.; Yao, X. Q.; Sun, S. B.; Lei, Z. Q. One bioprobe: a fluorescent and AIE-active macromolecule; two targets: nucleolus and mitochondria with long term tracking. *J. Mater. Chem. B*, 2017, **5**, 655-660.
- [4] Zhou, X.; Wang, X. H.; Zhang, T. Y.; Shen, L. Y.; Yang, X. J.; Zhang, Q. L.; Xu, H.; Redshaw, C.; Xing, F. Pyrene-Based Cationic Fluorophores with High Affinity for  $\text{BF}_4^-$ ,  $\text{PF}_6^-$ , and  $\text{ClO}_4^-$  Anions: Detection and Removal. *J. Org. Chem.*, 2023, **88**, 13520-13527.
